# Supplementary material
Source: PubMed Central journal article supplement (PMC6078820)
Supplement: NIHMS980055-supplement-supplement_1.pdf [file NIHMS980055-supplement-supplement_1.pdf]

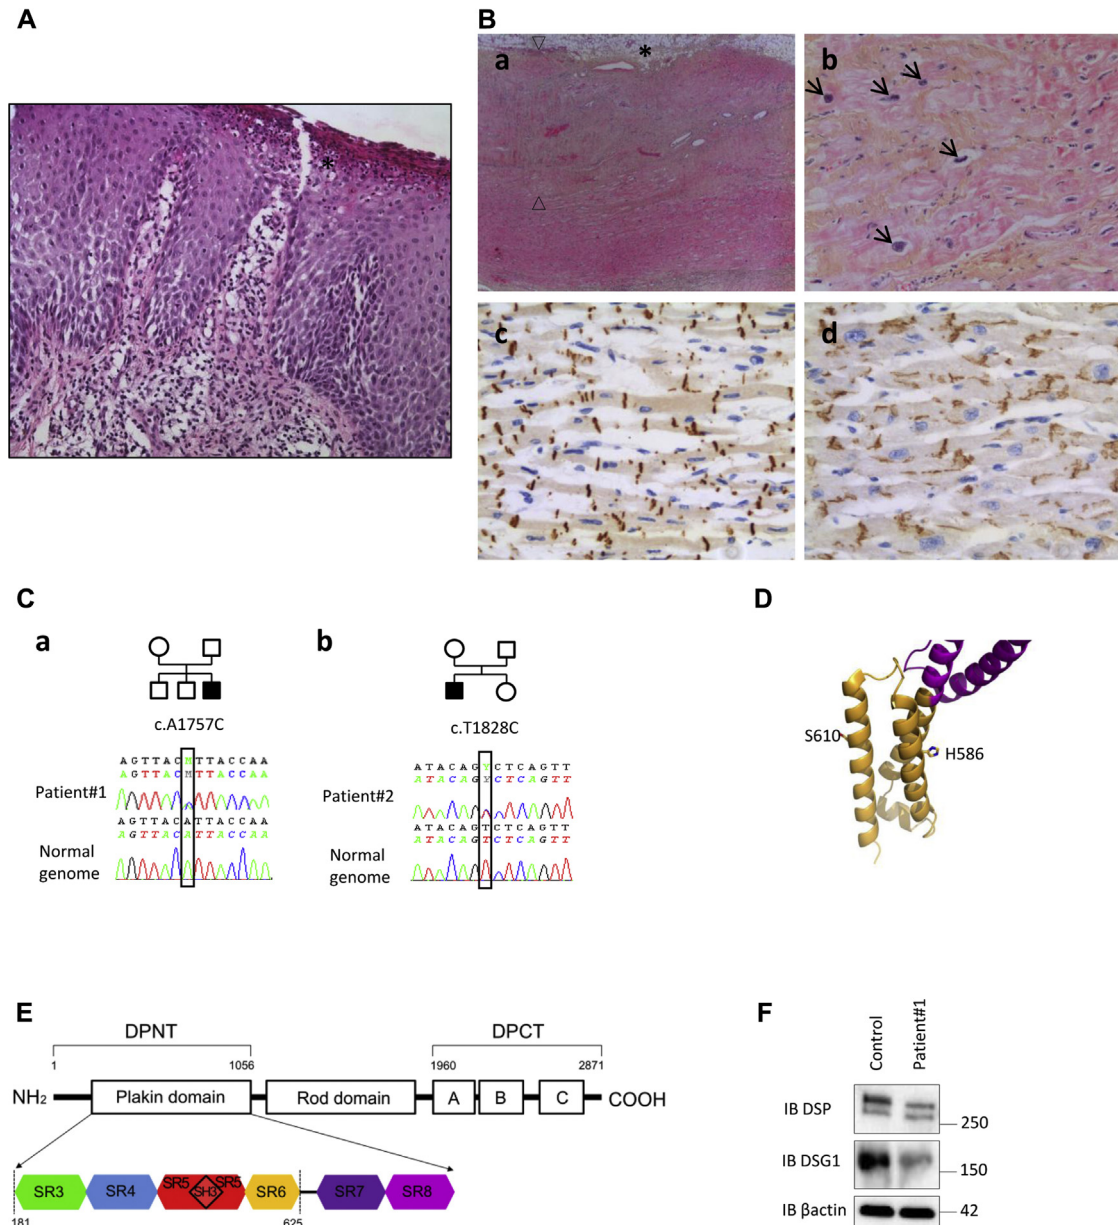

**FIG E1.** Histopathologic and molecular features of patients 1 and 2. **A**, Histopathology of a skin biopsy specimen (patient 2) revealed acanthosis, acantholysis (lower part of the epidermis), inflammatory infiltrate (lymphocytes and histiocytes) in the dermis, and a pustula with neutrophils (*asterisk*;  $\times 200$  magnification for the *inset* of Fig E1, **A** and **B**, **b**). **B**, Histopathology of heart explants (left ventricle, patient 2) showing fatty infiltration (epicardium, *asterisk*) and major fibrous infiltration (subepicardium, *arrows*, **a**;  $\times 25$  magnification for Fig E1, **B**, **a**). Presence of dystrophic nuclei in the cardiomyocytes is shown (fibrotic areas, *arrows*, **b**). Immunohistochemical comparison of DSP expression in heart sections shows a strong and regular pattern of reactivity in the intercalated discs (control, **c**) compared with the lower and abnormally distributed pattern (patient 2, **d**). **C**, Pedigrees and sequence electropherograms of patients 1 (**a**) and 2 (**b**). **D**, Locations of H586 and S610 residues within DSP's SR6 domain (orange) at the surface of straight  $\alpha$ -helices. The SR5 domain is shown in magenta. **E**, DSP protein consists of 3 major regions with the indicated amino acid boundaries. Close-up view of the plakin domain within the DSP N-terminal domain (*DPNT*), with colored regions representing the 4 spectrin repeats found in the crystal structure of DSP (residues 181-625). The figure was used with permission from Choi et al.<sup>E3</sup> **F**, Immunoblots of DSP and DSG1 in keratinocytes from patient 1 and a control subject.

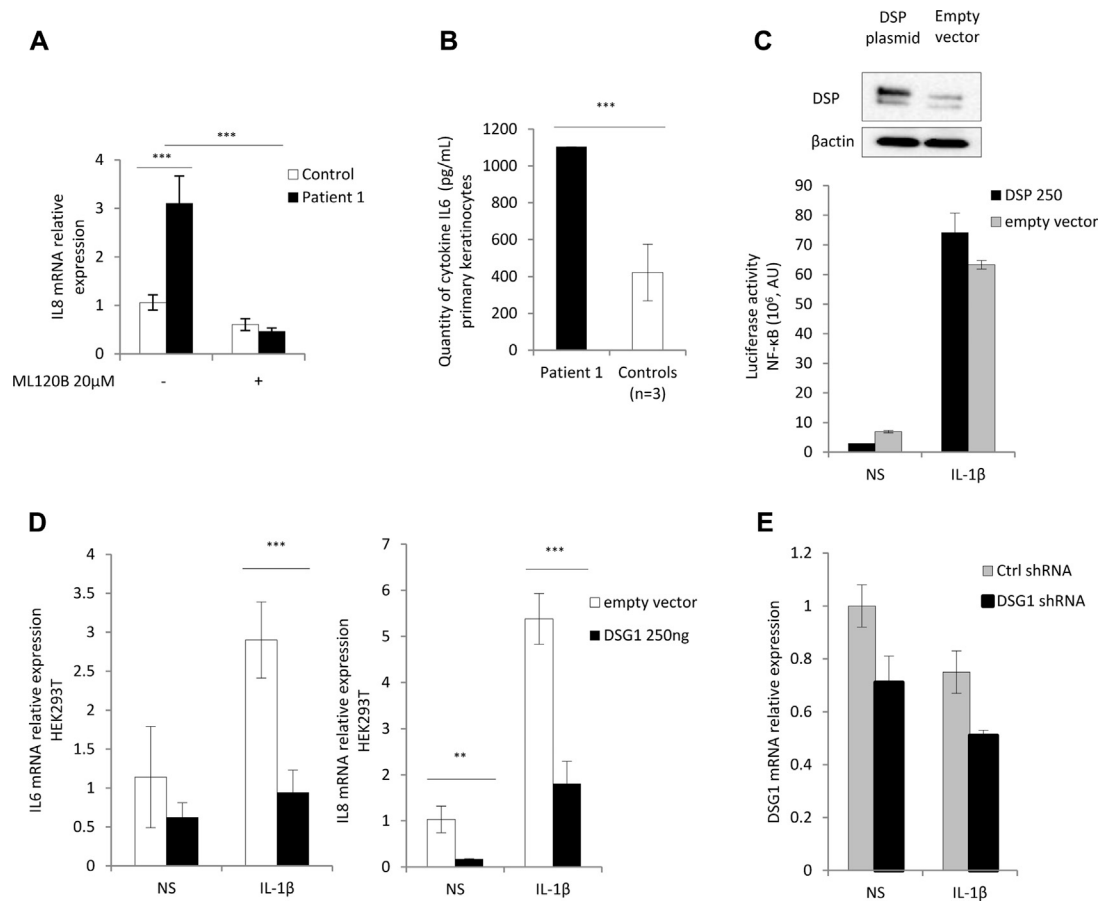

**FIG E2.** DSG1 inhibits NF- $\kappa$ B-mediated epithelial inflammation. **A**, Relative mRNA expression of *IL8* analyzed by using quantitative RT-PCR in primary keratinocytes from patient 1 and a healthy control subject after inhibition of IKK $\beta$  by ML120B. **B**, *IL6* production by keratinocytes from patient 1 and control subjects ( $n = 3$ ). **C**, NF- $\kappa$ B luciferase reporter assay in HEK293T cells transfected with 250 ng of DSP. *Inset*, Western blot analysis of DSP expression in HEK293T cells transfected with 250 ng of DSP. **D**, *IL6* and *IL8* mRNA relative expression in HEK293T cells transfected with DSG1 (250 ng) and stimulated with IL-1 $\beta$ . **E**, *DSG1* mRNA relative expression in control keratinocytes infected with lentivirus expressing shDSG1 and stimulated or not with IL-1 $\beta$ . AU, Arbitrary units; NS, nonstimulated. \*\* $P < .01$  and \*\*\* $P < .001$ .

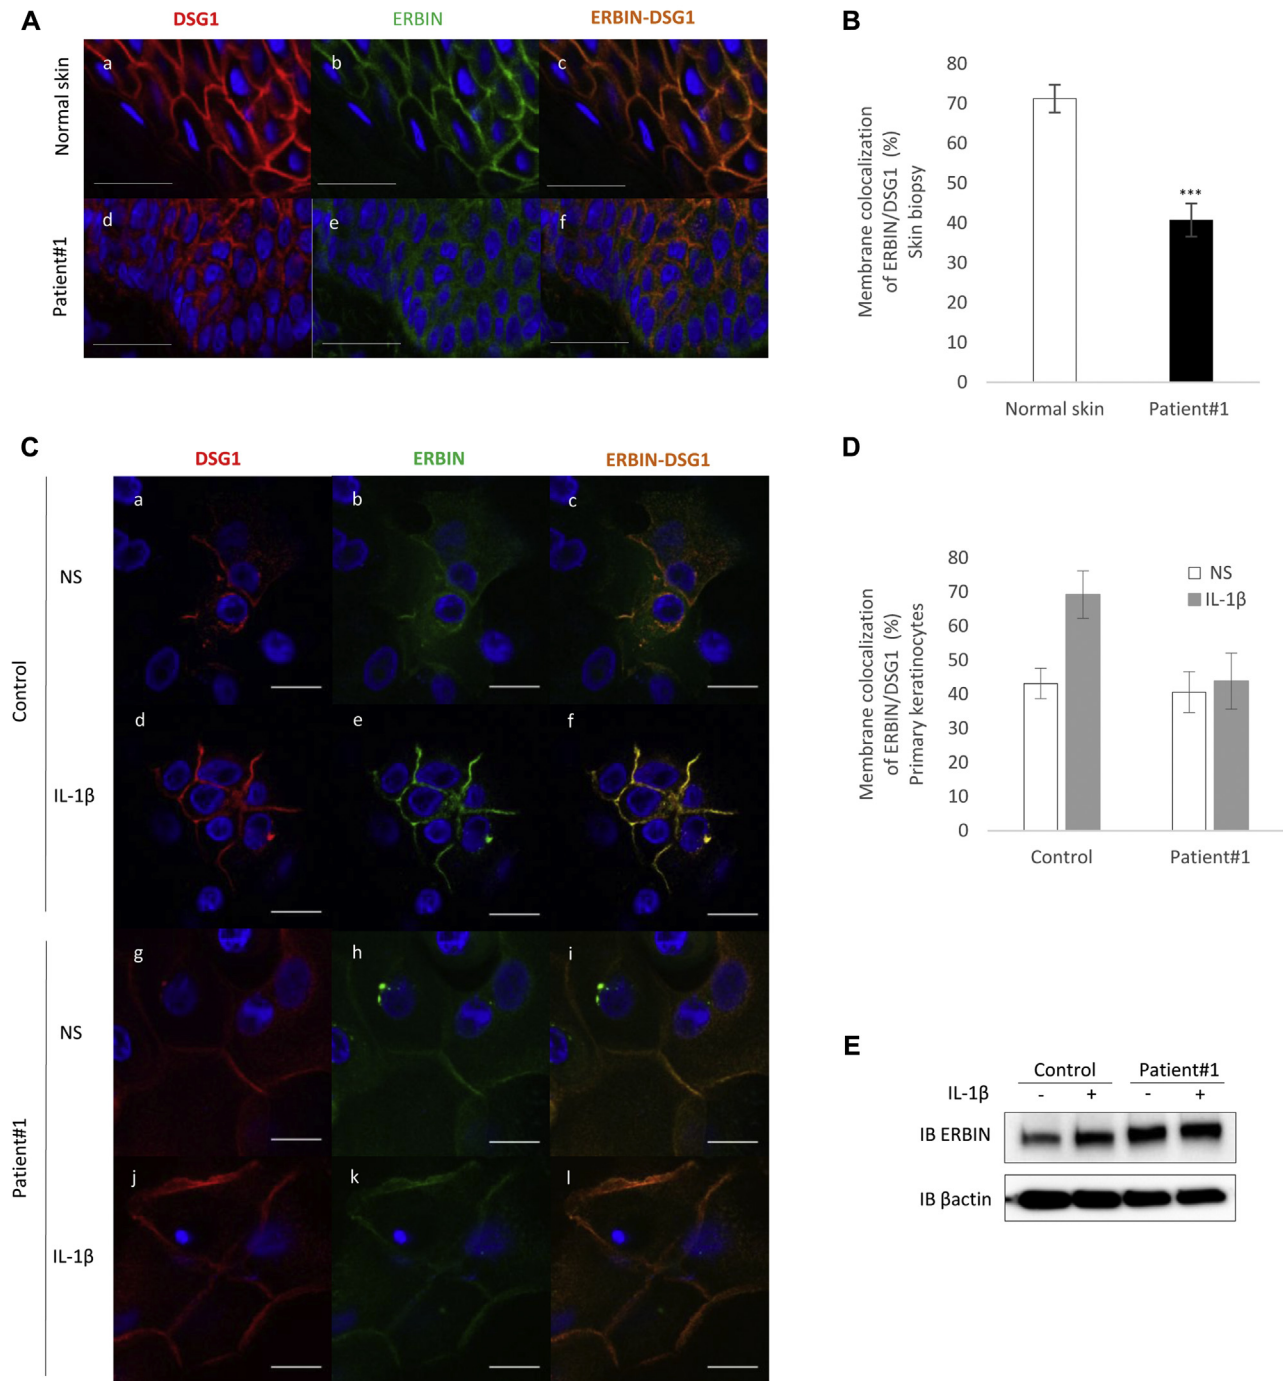

**FIG E3.** Expression and subcellular localization of ERBIN in the keratinocytes of patient 1. **A**, Immunofluorescence analysis of skin sections from a healthy control subject (*a-c*) and from patient 1 (*d-f*) showing a reduction in DSG1 (in red) and ERBIN (in green) staining at the plasma membrane of patient 1's keratinocytes. The 2 proteins accumulated in the cytoplasm of patient 1's keratinocytes. Scale bar = 20  $\mu$ m. Data are representative of 3 independent experiments. **B**, Quantification of ERBIN/DSG1 colocalization at the plasma membranes in skin keratinocytes from a healthy control subject and patient 1. **C**, Immunofluorescence analysis of primary keratinocytes from a healthy control subject (*a-f*) and patient 1 (*g-i*). Note the increase in DSG1 (in red) and ERBIN (in green) staining at the plasma membrane of control keratinocytes (*d-f*) after stimulation with IL-1 $\beta$ . This increase was absent in patient 1's keratinocytes (*j-l*). Scale bar = 20  $\mu$ m. Data are representative of 2 independent experiments (controls,  $n = 3$ ). **D**, Quantification of ERBIN/DSG1 colocalization at the plasma membrane of primary keratinocytes. **E**, Immunoblotting of ERBIN in keratinocytes from patient 1 and a healthy control subject. Primary keratinocytes were either stimulated with IL-1 $\beta$  or not stimulated (NS). Data are shown as means  $\pm$  SDs. \*\*\* $P < .001$ .

**TABLE E1.** Main clinical characteristics of reported patients with SAM syndrome caused by recessive mutation in the *DSG1* gene

| Disease      | Total patients           | Past familial history                | Dermatologic symptoms                                                                             | Features of ectodermal dysplasia |       |                                           |               | Allergic details                                                                        | Cardiac involvement                            | <i>DSG1</i> mutation                                                                      |
|--------------|--------------------------|--------------------------------------|---------------------------------------------------------------------------------------------------|----------------------------------|-------|-------------------------------------------|---------------|-----------------------------------------------------------------------------------------|------------------------------------------------|-------------------------------------------------------------------------------------------|
|              |                          |                                      |                                                                                                   | Hair                             | Teeth | Nails                                     | Sweating      |                                                                                         |                                                |                                                                                           |
| SAM syndrome | Two sisters              | Diffuse plantar keratoderma (mother) | PPK, skin fragility, congenital ichthyosiform erythroderma                                        | Sparse                           | NS    | NS                                        | NS            | Severe food allergies, increased total IgE levels, eosinophilic esophagitis (1 patient) | No (1)/muscular ventricular-septal defects (1) | c.49-1G>A (homozygous) <sup>E4</sup>                                                      |
|              | Two sisters              | Focal palmar keratoderma (father)    | Congenital erythroderma                                                                           | Sparse                           | NS    | NS                                        | NS            | Multiple food allergies, increased total IgE levels                                     | No                                             | c.1861delG (homozygous) <sup>E4</sup>                                                     |
|              | 1 (F)                    | Focal plantar keratoderma (mother)   | PPK, atopic dermatitis since the first month of life with severe generalized flares of dermatitis | Curly                            | No    | No                                        | NS            | Multiple allergies, increased total IgE levels                                          | No                                             | c.2659C>T, p.R887*, exon 15 (homozygous) <sup>E5</sup>                                    |
|              | Two half brothers        | Mild PPK (mother)                    | PPK, skin erosions, psoriasiform and eczematous erythroderma in the first few months of life      | No                               | No    | No                                        | No (1)/NS (1) | Multiple allergies, increased total IgE levels                                          | No                                             | c.2614delA (p.Ile872Serfs*10), exon 15 (homozygous) <sup>E6</sup>                         |
|              | Two brothers and sisters | PPK (both parents)                   | PPK, skin erosions, congenital erythroderma                                                       | Curly and hard                   | No    | No (1)/“affected nails” w/o precision (1) | NS            | Isolated increased total IgE levels for the boy                                         | No                                             | c.1892-1delG/p.Gly631Glnfs*8, exon 14 (homozygous) <sup>E7</sup>                          |
|              | 1 (F)                    | PPK (father)                         | PPK, transient erythematous patches                                                               | Curly                            | No    | No                                        | No            | Slight increased total IgE levels, no clinical manifestation of allergy                 | No                                             | c.811_812delAC, (p.Q271Vfs*20), exon 7 + c.2100+4A>G, IVS14+4A>G, intron 14 <sup>E8</sup> |

These 10 patients do not seem to have ectodermal dysplasia, even when they presented with ectodermal dysplasia features.

F, Female; NS, not specified; PPK, palmoplantar keratoderma; w/o, without.

**TABLE E2.** Main clinical characteristics of reported patients with SAM syndrome caused by a dominant mutation in the *DSP* gene

| Disease        | Total patients | Past familial history | Dermatologic symptoms                                                             | Features of ectodermal dysplasia                           |                                                                      |                     |          | Allergic details                                                | Cardiac involvement                                                                                                                                    | <i>DSP</i> mutation                                           |
|----------------|----------------|-----------------------|-----------------------------------------------------------------------------------|------------------------------------------------------------|----------------------------------------------------------------------|---------------------|----------|-----------------------------------------------------------------|--------------------------------------------------------------------------------------------------------------------------------------------------------|---------------------------------------------------------------|
|                |                |                       |                                                                                   | Hair                                                       | Teeth                                                                | Nails               | Sweating |                                                                 |                                                                                                                                                        |                                                               |
| SAMEC syndrome | 1 (M)          | NS                    | Diffuse PPK, erythroderma from the first week of life with superficial pustulosis | Yes, hypotrichosis                                         | Yes, hypodontia                                                      | Yes, nail dystrophy | NS       | Multiple food allergies, increased total IgE levels             | Normal at 6 y (clinical examination and ultrasonography)                                                                                               | c.1757A>C (p.His586Pro-, exon 14 (heterozygous) <sup>E9</sup> |
|                | 1 (M)          | NS                    | PPK, erythrokeratoderma                                                           | Yes, sparse hair at birth, scalp hair was absent afterward | Yes, enamel defect, no hypodontia on primary teeth (but died at 3 y) | Yes, nail dystrophy | NS       | No clinical manifestation of allergy, normal level of total IgE | Yes, marked left atrial and ventricular dilation and right ventricular dilation with an ejection fraction of 20%; patient died of heart failure at 3 y | Q616P, exon 14 (heterozygous) <sup>E10</sup>                  |
|                | 1 (M)          |                       | PPK, erythrokeratoderma                                                           | Yes, sparse eyebrows, eyelashes, and scalp hair            | Yes, hypodontia, enamel defects                                      | Yes, nail dystrophy | NS       | No clinical manifestation of allergy, normal level of total IgE | Yes, pronounced left ventricular dilation and right atrial dilation                                                                                    | H618P, exon 14 (heterozygous) <sup>E10</sup>                  |
|                | 1 (F)          |                       | PPK, erythrokeratoderma                                                           | Yes, sparse eyebrows, eyelashes, and scalp hair            | Yes, hypodontia                                                      | Yes, nail dystrophy | NS       | No clinical manifestation of allergy, normal level of total IgE | Yes, a moderately dilated left ventricle with low normal systolic function                                                                             | L622P, exon 14 (heterozygous) <sup>E10</sup>                  |

These 4 patients have ectodermal dysplasia.

F, Female; M, male; NS, not specified; PPK, palmoplantar keratoderma.
